# Supplementary material for: The impact of prehabilitation interventions on affective and functional outcomes for young to midlife adult cancer patients: A systematic review
Source: PubMed Central journal article supplement — Psychooncology. 2022 Oct 4;31(12):2050–62. doi: 10.1002/pon.6029 (PMC10092088; doi:10.1002/pon.6029), 2022-10-04
Supplement: PON-31-2050-s001.pdf [file PON-31-2050-s001.pdf]

## Supplementary Information 1

### *Quality Assessment (Dunne et al., 2017)*

| Criteria - quantitative studies                                        | Ambler et al., 1999 | Belleau et al., 2001 | Brahmbhatt et al., 2020 | Can et al., 2009 | de Moor et al., 2008 | de Paleville et al., 2007 | Foley et al., 2010 | Garssen et al., 2013 | Li et al., 2017 | Millstein et al., 2019 | Singh et al., 2017 | Zaman et al., 2021 | Galantino et al., 2012 |
|------------------------------------------------------------------------|---------------------|----------------------|-------------------------|------------------|----------------------|---------------------------|--------------------|----------------------|-----------------|------------------------|--------------------|--------------------|------------------------|
| 1. Clearly stated aims                                                 | 2                   | 2                    | 2                       | 2                | 2                    | 2                         | 1                  | 1                    | 1               | 2                      | 2                  | 2                  | 2                      |
| 2. Participant eligibility and recruitment strategy clearly documented | 1                   | 2                    | 2                       | 2                | 1                    | 1                         | 2                  | 2                    | 1               | 2                      | 2                  | 2                  | 2                      |
| 3. Main features of population/design described                        | 2                   | 2                    | 2                       | 2                | 2                    | 2                         | 2                  | 2                    | 2               | 2                      | 2                  | 2                  | 2                      |
| 4. Non-responders (and non-participants) described                     | 2                   | 0                    | 2                       | 2                | 2                    | 0                         | 2                  | 2                    | 2               | 1                      | 1                  | 2                  | 1                      |
| 5. Presence of a control group                                         | 0                   | 1                    | 0                       | 2                | 1                    | 0                         | 2                  | 2                    | 2               | 0                      | 0                  | 2                  | 0                      |
| 6. Main limitations identified and acceptable                          | 2                   | 1                    | 2                       | 2                | 2                    | 0                         | 1                  | 1                    | 0               | 2                      | 1                  | 2                  | 1                      |
| 7. Sample size justified                                               | 0                   | 0                    | 1                       | 2                | 2                    | 0                         | 2                  | 2                    | 0               | 2                      | 0                  | 2                  | 1                      |
| 8. No evidence of selective reporting of results                       | 2                   | 2                    | 2                       | 2                | 2                    | 2                         | 2                  | 2                    | 2               | 2                      | 2                  | 2                  | 0                      |
| 9. Statistical methods described                                       | 1                   | 2                    | 2                       | 2                | 2                    | 1                         | 2                  | 2                    | 2               | 2                      | 2                  | 2                  | 1                      |
| 10. Statistical methods appropriate                                    | 0                   | 2                    | 2                       | 2                | 2                    | 2                         | 2                  | 2                    | 1               | 2                      | 2                  | 2                  | 2                      |
| 11. Measures relevant, validated and described adequately              | 2                   | 2                    | 2                       | 2                | 1                    | 2                         | 2                  | 2                    | 2               | 2                      | 2                  | 2                  | 2                      |
| 12. Results discussed adequately                                       | 2                   | 2                    | 2                       | 2                | 2                    | 2                         | 2                  | 2                    | 2               | 2                      | 2                  | 2                  | 1                      |
| <b>Total score</b>                                                     | <b>16</b>           | <b>18</b>            | <b>21</b>               | <b>24</b>        | <b>21</b>            | <b>14</b>                 | <b>22</b>          | <b>22</b>            | <b>17</b>       | <b>21</b>              | <b>18</b>          | <b>24</b>          | <b>15</b>              |

*Note.* Score Key: Y (Yes) = Score of 2; P (Partial) = Score of 1; N (No) = Score of 0; DK (Don't know) = Score of 0, Scoring: 17-24 = good quality; 9-16 = acceptable quality; 0-8 = low quality
