# Supplementary material for: The impact of prehabilitation interventions on affective and functional outcomes for young to midlife adult cancer patients: A systematic review
Source: PubMed Central journal article supplement — Psychooncology. 2022 Oct 4;31(12):2050–62. doi: 10.1002/pon.6029 (PMC10092088; doi:10.1002/pon.6029), 2022-10-04
Supplement: PON-31-2050-s002.pdf [file PON-31-2050-s002.pdf]

## Supplementary Information 2

### *Search Strategy for Selected Databases*

| Database        | Strategy                                                                                                                                                                                              | Search                                                                                                                                                                                                                                                                                                                                                                                                                                                                                                                                                                             |
|-----------------|-------------------------------------------------------------------------------------------------------------------------------------------------------------------------------------------------------|------------------------------------------------------------------------------------------------------------------------------------------------------------------------------------------------------------------------------------------------------------------------------------------------------------------------------------------------------------------------------------------------------------------------------------------------------------------------------------------------------------------------------------------------------------------------------------|
| PubMed<br>(186) | Expanders: Apply all fields<br>Limiters: English, Nursing Journals, Humans<br>Operators: Boolean,<br>Mesh Terms: *,?                                                                                  | ((Intervention or support* or promotion or therap* or treatment or multimodal or combined ) AND (exercise* or physical activit* or lifestyle or strength training or nutrition* or diet* or calorie* or protein* or wellbeing or meditation or yoga or psychological or emotional or fitness or non-pharmaceutical) )AND (( neoplasms [mesh] or cancer patient* or oncology patient* or neoplasm patient* or tumo?r ) AND ( Prehabilitation or prehab* or pre-operative rehabilitation or peri-operative rehabilitation or "before treatment" or "before surgery" or presurgical)) |
| MEDLINE         | Expanders: Apply related words, Apply equivalent subjects<br>Limiters: Scholarly (Peer Reviewed) Journals, English Language, Human<br>Operators: Boolean<br>Expander Terms: Mesh<br>Terms * and #     | ((Intervention or support* or promotion or therap* or treatment or multimodal or combined) AND (exercise* or physical activit* or lifestyle or strength training or nutrition* or diet* or calorie* or protein* or wellbeing or meditation or yoga or psychological or emotional or fitness or non-pharmaceutical) AND (neoplasms [mesh] or cancer patient* or oncology patient* or neoplasm patient* or tumo#r ) AND ( Prehabilitation or prehab* or pre-operative rehabilitation or peri-operative rehabilitation or "before treatment" or "before surgery" or presurgical))     |
| CINHAL          | Expanders: Apply related words, Apply equivalent subjects<br>Limiters: English Language; Peer Reviewed; Exclude MEDLINE records; Human<br>Operators: Boolean<br>Expander Terms: Mesh<br>Terms * and # | As above.                                                                                                                                                                                                                                                                                                                                                                                                                                                                                                                                                                          |
| PsychINFO       | Expanders: Apply related words; Apply equivalent subjects<br>Limiters: Peer Reviewed; English; Population Group: Human<br>Operators: Boolean<br>Expander Terms: Mesh<br>Terms * and #                 | As MEDLINE above.                                                                                                                                                                                                                                                                                                                                                                                                                                                                                                                                                                  |
| EMBASE          | Expander: Map to preferred term in Emtree, Explode using narrower Emtree terms<br>Limiters: English only, source embase only,                                                                         | ((exercise* OR 'physical activit*' OR 'lifestyle'/exp OR 'strength training'/exp OR nutrition* OR diet* OR calorie* OR protein* OR 'wellbeing'/exp OR 'meditation'/exp OR 'yoga'/exp OR psychological OR emotional OR 'fitness'/exp OR 'non pharmaceutical') AND ('intervention'/exp OR support* OR 'promotion'/exp OR therap* OR treatment* OR multimodal OR combined)) AND ((                                                                                                                                                                                                    |

|                                                                                                                                                                      |                                                                                                                                                                                                                                                                         |
|----------------------------------------------------------------------------------------------------------------------------------------------------------------------|-------------------------------------------------------------------------------------------------------------------------------------------------------------------------------------------------------------------------------------------------------------------------|
| publication types: Article, Article in press, Conference paper, data paper, humans<br>Operators: Boolean<br>Expander Terms: Mesh<br>Terms: Emtree (mesh) terms, *, ? | 'prehabilitation'/exp OR prehab* OR 'pre-operative rehabilitation'/exp OR 'peri-operative rehabilitation' OR 'before treatment' OR 'before surgery' OR presurgical) AND ('neoplasm'/exp OR 'cancer patients*' OR 'oncology patient*' OR 'neoplasm patient*' OR tumo?r)) |
|----------------------------------------------------------------------------------------------------------------------------------------------------------------------|-------------------------------------------------------------------------------------------------------------------------------------------------------------------------------------------------------------------------------------------------------------------------|
